# Supplementary material for: Exome sequencing reveals variants in known and novel candidate genes for severe sperm motility disorders
Source: PubMed Central journal article supplement (PMC8373475; doi:10.1093/humrep/deab099), 2021-06-05
Supplement: deab099_supplementary_tables2.pdf [file deab099_supplementary_tables2.pdf]

human reproduction SUPPLEMENTARY DATA

Supplementary Table S11 Exome filtering statistics.

| Patient ID     | Total variants | Variant present in >5 reads | Variant present in >15% of reads | Variant frequency in <1% in gnomAD, dbSNP and Nijme gen database | Variant coding and non-synonymous/canonical splice site/synonymous splice site | Homozygous variants (% variation >85) | Compound heterozygous (gene name present > 1x) | X-linked (chrX and % variation >85) | Y-linked (chrY and % variation >85) | Qualifying variants in known genes | Homozygous variants in homozygosity region | Variables in gene with enhanced expression in testis | Interacts with DFS-MMAF or infertility gene | Infertility described in mice | Sum of prioritized variants | Likely real variants (Bam file check) | Predicted VUS or higher* |
|----------------|----------------|-----------------------------|----------------------------------|------------------------------------------------------------------|--------------------------------------------------------------------------------|---------------------------------------|------------------------------------------------|-------------------------------------|-------------------------------------|------------------------------------|--------------------------------------------|------------------------------------------------------|---------------------------------------------|-------------------------------|-----------------------------|---------------------------------------|--------------------------|
| <b>ARG1</b>    | 82150          | 63997                       | 63349                            | 3175                                                             | 685                                                                            | 13                                    | 153                                            | 2                                   | 0                                   | 0                                  | 0                                          | 29                                                   | 40                                          | 4                             | 66                          | 18                                    | 4                        |
| <b>ARG2</b>    | 107887         | 89660                       | 88712                            | 4333                                                             | 641                                                                            | 16                                    | 157                                            | 5                                   | 2                                   | 3                                  | 0                                          | 37                                                   | 28                                          | 7                             | 59                          | 14                                    | 3                        |
| <b>ARG3</b>    | 59275          | 50364                       | 49752                            | 2360                                                             | 571                                                                            | 6                                     | 130                                            | 5                                   | 0                                   | 0                                  | 0                                          | 18                                                   | 51                                          | 2                             | 65                          | 19                                    | 4                        |
| <b>ARG4</b>    | 78845          | 61952                       | 61276                            | 3274                                                             | 636                                                                            | 16                                    | 139                                            | 4                                   | 0                                   | 0                                  | 4                                          | 18                                                   | 35                                          | 3                             | 51                          | 19                                    | 3                        |
| <b>ARG5</b>    | 68292          | 51836                       | 51289                            | 2824                                                             | 661                                                                            | 12                                    | 140                                            | 7                                   | 0                                   | 0                                  | 2                                          | 25                                                   | 48                                          | 5                             | 71                          | 16                                    | 1                        |
| <b>ARG6</b>    | 69927          | 56715                       | 56128                            | 2825                                                             | 611                                                                            | 14                                    | 146                                            | 10                                  | 0                                   | 1                                  | 1                                          | 15                                                   | 51                                          | 10                            | 61                          | 17                                    | 2                        |
| <b>ARG7</b>    | 70029          | 56008                       | 55369                            | 2552                                                             | 612                                                                            | 8                                     | 139                                            | 4                                   | 0                                   | 0                                  | 0                                          | 21                                                   | 43                                          | 7                             | 59                          | 12                                    | 6                        |
| <b>ARG8</b>    | 37148          | 36313                       | 35555                            | 1744                                                             | 669                                                                            | 45                                    | 183                                            | 7                                   | 0                                   | 0                                  | 30                                         | 50                                                   | 69                                          | 21                            | 120                         | 58                                    | 21                       |
| <b>ARG9</b>    | 38886          | 38107                       | 37366                            | 1720                                                             | 645                                                                            | 11                                    | 178                                            | 7                                   | 0                                   | 4                                  | 0                                          | 34                                                   | 62                                          | 16                            | 93                          | 26                                    | 6                        |
| <b>AUS1</b>    | 103157         | 72318                       | 71407                            | 2717                                                             | 620                                                                            | 8                                     | 186                                            | 9                                   | 0                                   | 0                                  | 0                                          | 33                                                   | 47                                          | 5                             | 76                          | 11                                    | 6                        |
| <b>AUS2</b>    | 105026         | 74336                       | 73440                            | 3022                                                             | 670                                                                            | 19                                    | 198                                            | 6                                   | 0                                   | 2                                  | 2                                          | 37                                                   | 48                                          | 7                             | 85                          | 21                                    | 7                        |
| <b>AUS3</b>    | 110396         | 80236                       | 79341                            | 3056                                                             | 585                                                                            | 6                                     | 167                                            | 8                                   | 0                                   | 0                                  | 0                                          | 42                                                   | 41                                          | 5                             | 80                          | 16                                    | 11                       |
| <b>AUS4</b>    | 114017         | 84540                       | 83539                            | 4494                                                             | 852                                                                            | 20                                    | 235                                            | 12                                  | 2                                   | 0                                  | 1                                          | 51                                                   | 44                                          | 6                             | 91                          | 28                                    | 9                        |
| <b>AUS5</b>    | 108397         | 78217                       | 77273                            | 3251                                                             | 635                                                                            | 12                                    | 189                                            | 2                                   | 0                                   | 1                                  | 1                                          | 40                                                   | 38                                          | 7                             | 75                          | 15                                    | 3                        |
| <b>AUS6</b>    | 110653         | 80588                       | 79707                            | 3308                                                             | 660                                                                            | 18                                    | 204                                            | 4                                   | 0                                   | 0                                  | 1                                          | 39                                                   | 64                                          | 12                            | 106                         | 15                                    | 1                        |
| <b>AUS7</b>    | 116748         | 86819                       | 85905                            | 3901                                                             | 776                                                                            | 14                                    | 222                                            | 11                                  | 0                                   | 0                                  | 1                                          | 52                                                   | 63                                          | 3                             | 108                         | 21                                    | 4                        |
| <b>AUS8</b>    | 107827         | 76962                       | 75940                            | 3142                                                             | 652                                                                            | 20                                    | 186                                            | 7                                   | 0                                   | 1                                  | 2                                          | 35                                                   | 46                                          | 5                             | 82                          | 5                                     | 1                        |
| <b>AUS9</b>    | 115302         | 87532                       | 86427                            | 4701                                                             | 947                                                                            | 17                                    | 251                                            | 13                                  | 0                                   | 3                                  | 2                                          | 56                                                   | 57                                          | 3                             | 110                         | 22                                    | 1                        |
| <b>AUS10</b>   | 116180         | 87348                       | 86312                            | 4498                                                             | 857                                                                            | 19                                    | 216                                            | 5                                   | 3                                   | 0                                  | 0                                          | 39                                                   | 43                                          | 5                             | 78                          | 26                                    | 2                        |
| <b>AUS11</b>   | 115126         | 85846                       | 84819                            | 3465                                                             | 674                                                                            | 8                                     | 239                                            | 6                                   | 0                                   | 0                                  | 0                                          | 44                                                   | 64                                          | 13                            | 109                         | 18                                    | 3                        |
| <b>AUS12</b>   | 107314         | 78293                       | 77445                            | 3007                                                             | 649                                                                            | 29                                    | 191                                            | 10                                  | 0                                   | 1                                  | 17                                         | 43                                                   | 47                                          | 9                             | 97                          | 29                                    | 10                       |
| <b>Average</b> | 92503.9        | 70380.3                     | 69540.5                          | 3208.0                                                           | 681.3                                                                          | 15.8                                  | 183.3                                          | 6.9                                 | 0.3                                 | 0.8                                | 3.0                                        | 36.1                                                 | 49.0                                        | 7.4                           | 83.0                        | 20.3                                  | 5.1                      |

\*ACMG classification. VUS, variant of unknown significance.
