# Supplementary material for: Exome sequencing reveals variants in known and novel candidate genes for severe sperm motility disorders
Source: PubMed Central journal article supplement (PMC8373475; doi:10.1093/humrep/deab099), 2021-06-05
Supplement: deab099_supplementary_tables3.pdf [file deab099_supplementary_tables3.pdf]

Supplementary Table SIII All prioritized variants.

| Patient     | Gene   | Transcript        | gDNA variant                  | cDNA                | Protein            | Zygosity                    | GnomAD variant frequency (population with highest frequency) | Predicted to be pathogenic* | Variant classification (ACMG)** | Gene expression enriched in testis*** | Interaction with known infertility gene***                                         | Disease model described (PMID)                               | Additional information (PMID)                                                                                                                                                                 | Conclusion               |                          |
|-------------|--------|-------------------|-------------------------------|---------------------|--------------------|-----------------------------|--------------------------------------------------------------|-----------------------------|---------------------------------|---------------------------------------|------------------------------------------------------------------------------------|--------------------------------------------------------------|-----------------------------------------------------------------------------------------------------------------------------------------------------------------------------------------------|--------------------------|--------------------------|
| <b>ARG1</b> | DNAH2  | ENST00000351747.2 | Chr3(GRCh37): 57357584 G>A    | c.5393T>C           | p.(Phe1798Ser)     | Het                         | 0.1% (AFR: 0.4%)                                             | N/A                         | VUS                             | Yes                                   | Interacts with known asthenozoospermia genes DNAH1 and DNAH17                      | No                                                           | -                                                                                                                                                                                             | Novel candidate gene     |                          |
|             |        |                   | Chr3(GRCh37): 57407357 A>G    | c.7438C>T           | p.(Pro2480Ser)     | Het                         | 0.0% (AFR: 0.2%)                                             | N/A                         | VUS                             | -                                     | -                                                                                  | -                                                            | -                                                                                                                                                                                             | -                        |                          |
|             |        |                   | Chr18(GRCh37): g.14513699     | c.1492_1495del      | p.(Gln498Serfs*3)  | Het                         | 0% (AFR: 0.03%)                                              | N/A                         | VUS                             | Yes                                   | -                                                                                  | -                                                            | -                                                                                                                                                                                             | -                        | -                        |
| <b>ARG2</b> | CFAP4  | ENST00000357060.7 | Chr10(GRCh37): g.105933623C>T | c.1442+1G>A         | p.?                | Het                         | 0.0% (NEE: 0.0%)                                             | N/A                         | Likely pathogenic               | Yes                                   | Interacts with known asthenozoospermia genes DNAH1 and SFEZ                        | Yes, mouse (28552195)<br>c.1040T>C previously seen (2949551) | Known gene (28552195).                                                                                                                                                                        | Disease causing          |                          |
|             |        |                   | Chr10(GRCh37): g.105963506A>G | c.1019T>C           | p.(Phe240Ser)      | Het (in dis with c.1040T>C) | 0.0% (NEE: 0.03%)                                            | -                           | Unlikely pathogenic             | -                                     | -                                                                                  | -                                                            | -                                                                                                                                                                                             | -                        | -                        |
|             |        |                   | Chr10(GRCh37): g.105963485A>G | c.1040T>C           | p.(Val347Ala)      | Het (in dis with c.1019T>C) | 0.0% (NEE: 0.02%)                                            | P                           | VUS                             | -                                     | -                                                                                  | -                                                            | -                                                                                                                                                                                             | -                        | -                        |
| <b>ARG3</b> | DNAH6  | ENST00000389394.7 | Chr2(GRCh37): g.84775542      | c.1316+1_1316+2insC | N/A                | Het                         | 0.0% (NEE: 0.0%)                                             | N/A                         | Likely pathogenic               | Yes                                   | Interacts with DNAH1, LRR6, DNAH17, CDC40, CDC39, PHI1D3, WD866 and DNAAF2         | Yes, mouse and zebrafish (26918822)                          | Mutations were previously described in patients with azoospermia (28206990), teratozoospermia characterized by globozoospermia and acapathic spermatozoa (29356036) and heterotaxy (26918822) | Disease causing          |                          |
|             |        |                   | Chr2(GRCh37): g.84926802C>T   | c.7762C>T           | p.(Arg2588*)       | Het                         | 0.0% (AMR: 0.0%)                                             | N/A                         | Pathogenic                      | -                                     | -                                                                                  | -                                                            | -                                                                                                                                                                                             | -                        | -                        |
|             |        |                   | Chr4(GRCh37): g.6477530G>A    | c.823G>A            | p.(Val275Met)      | Het                         | 0.0% (EAS: 0.02%)                                            | SMP                         | VUS                             | -                                     | -                                                                                  | -                                                            | -                                                                                                                                                                                             | -                        | -                        |
| <b>ARG4</b> | PIGG   | ENST00000337019.7 | Chr6(GRCh37): g.16348339T>A   | c.369T>A            | p.(Tyr123*)        | Hom                         | 0.00%                                                        | N/A                         | Likely pathogenic               | Yes                                   | Interacts with known asthenozoospermia genes DNAH17, SFEZ, DNAAF2, CDC40 and CDC39 | Yes, mouse (15148410)                                        | Associated with the development of sperm flagellum (15148410; 25715396)                                                                                                                       | Novel candidate gene     |                          |
|             |        |                   | Chr10(GRCh37): g.85997167A>C  | c.398T>G            | p.(Leu133Arg)      | Hom                         | 0.00% (NEE: 0.01%)                                           | SMP                         | VUS                             | -                                     | -                                                                                  | -                                                            | -                                                                                                                                                                                             | -                        | Unlikely disease causing |
|             |        |                   | ChrX(GRCh37): g.55287068C>T   | c.218G>A            | p.(Trp73*)         | Hem                         | 0.00%                                                        | N/A                         | Pathogenic                      | -                                     | -                                                                                  | -                                                            | -                                                                                                                                                                                             | -                        | Unlikely disease causing |
| <b>ARG5</b> | CFAP5B | ENST00000369704.8 | Chr10(GRCh37): g.106139973C>T | c.1360C>T           | p.(Gln454*)        | Hom                         | 0.05% (ASj: 1.09%)                                           | N/A                         | Pathogenic                      | Yes                                   | Interacts with known asthenozoospermia gene CDC40                                  | No                                                           | In homozygosity region Variant is relatively common in Ashkenazj Jewish population                                                                                                            | Novel candidate gene     |                          |
|             |        |                   | Chr3(GRCh37): g.11313393del   | c.652del            | p.(Arg218Aspfs*37) | Hom                         | 0.03% (ASj: 0.61%)                                           | N/A                         | Pathogenic                      | -                                     | -                                                                                  | -                                                            | -                                                                                                                                                                                             | -                        | Unlikely disease causing |
|             |        |                   | Chr11(GRCh37): g.95826041G>A  | c.1154C>T           | p.(Pro385Leu)      | Hom                         | 0.03% (ASj: 0.55%)                                           | ASMP                        | VUS                             | -                                     | -                                                                                  | -                                                            | -                                                                                                                                                                                             | -                        | Disease causing          |
| <b>ARG7</b> | DRK1   | ENST00000288710.7 | Chr2(GRCh37): g.24664264C>T   | c.238C>T            | p.(Arg80*)         | Het                         | 0.00% (FIN: 0.03%)                                           | N/A                         | Pathogenic                      | Yes                                   | Interacts with known asthenozoospermia genes CDC40, CDC39, LRR6, DNAAF2 and SFEZ   | Yes, Chlamydomonas reinhardtii (23354437)                    | Described in primary ciliary dyskinesia (23354437; 31270959)                                                                                                                                  | Novel candidate gene     |                          |
|             |        |                   | Chr2(GRCh37): g.31323230G>A   | c.352C>T            | p.(Gln118*)        | Het                         | 0.04% (NFE: 0.07%)                                           | N/A                         | Pathogenic                      | -                                     | -                                                                                  | -                                                            | -                                                                                                                                                                                             | -                        | Unlikely disease causing |
|             |        |                   | Chr15(GRCh37): g.31323230G>A  | c.3017C>T           | p.(Pro1006Leu)     | Het                         | 0.00%                                                        | ASHP                        | VUS                             | -                                     | -                                                                                  | -                                                            | -                                                                                                                                                                                             | -                        | Unlikely disease causing |
| <b>SDK2</b> | SDK2   | ENST00000392650.8 | Chr15(GRCh37): g.31323230G>A  | c.470C>T            | p.(Ser157Phe)      | Het                         | 0.35% (NFE: 0.58%)                                           | ASMP                        | VUS                             | Yes                                   | No                                                                                 | Yes (mouse), no infertility described                        | Known for night blindness, congenital stationary (con-plate), IC, autosomal recessive                                                                                                         | Unlikely disease causing |                          |
|             |        |                   | Chr17(GRCh37): g.71397309G>A  | c.2821C>T           | p.(Arg941Cys)      | Het                         | 0.11% (ASj: 0.33%)                                           | ASMP                        | VUS                             | -                                     | -                                                                                  | -                                                            | -                                                                                                                                                                                             | -                        | Unlikely disease causing |
|             |        |                   | Chr17(GRCh37): g.71397309G>A  | c.2426G>A           | p.(Arg809His)      | Het                         | 0.04% (NFE: 0.06%)                                           | SMP                         | VUS                             | -                                     | -                                                                                  | -                                                            | -                                                                                                                                                                                             | -                        | Unlikely disease causing |

(continued)

Supplementary Table SIII Continued

| Patient                        | Gene                 | Transcript                                                                                                                                                                                      | gDNA variant                            | cDNA                   | Protein              | Zygosity           | GnomAD variant frequency (population with highest frequency) | Predicted to be pathogenic* (ACMG)** | Variant classification (ACMG)** | Gene expression enriched in testis*** | Interaction with known infertility gene****                     | Disease model described (PMID)        | Additional information (PMID)                                                            | Conclusion               |
|--------------------------------|----------------------|-------------------------------------------------------------------------------------------------------------------------------------------------------------------------------------------------|-----------------------------------------|------------------------|----------------------|--------------------|--------------------------------------------------------------|--------------------------------------|---------------------------------|---------------------------------------|-----------------------------------------------------------------|---------------------------------------|------------------------------------------------------------------------------------------|--------------------------|
| Chr17(GRC37):<br>g.71410841C>T | <b>ARGB</b><br>DNAH6 |                                                                                                                                                                                                 |                                         |                        |                      |                    |                                                              |                                      |                                 |                                       |                                                                 |                                       |                                                                                          |                          |
|                                |                      | Interacts with known asthenozoospermia genes DNAH1, LRRC6, DNAH17, CCDC40, CCDC39, PHLN3, WD66 and DNAAF2                                                                                       | <b>ARGB</b><br>c.2099C>A                | DNAH6<br>p.(Pro687Thr) | Hom                  | 0.04% (NFE: 0.07%) | MP                                                           | MP                                   | VUS                             | No                                    | No                                                              | Yes, mouse (15078889)                 | Mouse displays asthenozoospermia (15078889). In homozygosity region                      | Novel candidate gene     |
|                                |                      | Mutations were previously described in patients with azoospermia (28206990), teratozoospermia characterized by globozoospermia and acrophalic spermatozoa (29356036) and heteroocary (26918822) |                                         |                        | Novel candidate gene |                    |                                                              |                                      | Yes                             |                                       |                                                                 |                                       |                                                                                          |                          |
| ATP2B4                         |                      | ENST00000357681.9                                                                                                                                                                               | Chr1(GRC37):<br>g.203667467G>C          | c.374G>C               | p.(Gly126Arg)        | Hom                | 0.01% (SAS: 0.08%)                                           | MP                                   | VUS                             | No                                    | No                                                              | Yes, mouse (15078889)                 | Mouse displays asthenozoospermia (15078889). In homozygosity region                      | Novel candidate gene     |
| CEP350                         |                      | ENST00000367607.8                                                                                                                                                                               | Chr1(GRC37):<br>g.17959730A>G           | c.229A>G               | p.(Arg77Gly)         | Hom                | 0.34% (ASj: 0.81%)                                           | ASMP                                 | VUS                             | No                                    | Interacts with known asthenozoospermia genes CEP135 and CEP290. | No                                    | In homozygosity region                                                                   | Novel candidate gene     |
| CEP290                         |                      | ENST0000052810.6                                                                                                                                                                                | Chr12(GRC37):<br>g.88465084T>C          | c.5998A>G              | p.(Ile2000Val)       | Het                | 0.02% (NFE: 0.04%)                                           | M                                    | VUS                             | No                                    | Interacts with known asthenozoospermia genes CEP135 and PKD1    | Yes, mouse (21623382)                 | Described in patients with Leber's Congenital Amaurosis and asthenozoospermia (22355252) | Novel candidate gene     |
| Chr12(GRC37):<br>g.88519120A>C |                      |                                                                                                                                                                                                 |                                         |                        |                      |                    |                                                              |                                      |                                 |                                       |                                                                 |                                       |                                                                                          |                          |
| ENTPD3                         |                      | ENST00000301825.7                                                                                                                                                                               | Chr3(GRC37):<br>g.40464372C>T           | c.863C>T               | p.(Pro288Leu)        | Hom                | 0.05% (AMR: 0.13)                                            | ASMP                                 | VUS                             | No                                    | Interacts with known asthenozoospermia genes AK7                | Yes (mouse), no infertility described | In homozygosity region                                                                   | Unlikely disease causing |
| CTNND1                         |                      | ENST00000361391.10                                                                                                                                                                              | Chr11(GRC37):<br>g.5756302C>T           | c.271C>T               | p.(His91Tyr)         | Het                | 0.00%                                                        | SMP                                  | VUS                             | Yes                                   | Interacts with known infertility gene FGFR1                     | No                                    | -                                                                                        | Unlikely disease causing |
| Chr11(GRC37):<br>g.57571209A>G |                      |                                                                                                                                                                                                 |                                         |                        |                      |                    |                                                              |                                      |                                 |                                       |                                                                 |                                       |                                                                                          |                          |
| TOR3A                          |                      | ENST00000367627.8                                                                                                                                                                               | Chr1(GRC37):<br>g.179054841A>G          | c.452A>G               | p.(Tyr151Cys)        | Hom                | 0.00%                                                        | ASMP                                 | VUS                             | No                                    | No                                                              | No                                    | In homozygosity region                                                                   | Unlikely disease causing |
| OCLM                           |                      | ENST00000574641.2                                                                                                                                                                               | Chr1(GRC37):<br>g.186370281C>G          | c.104C>G               | p.(Ser35Cys)         | Hom                | 0.46% (NFE: 0.74%)                                           | N/A                                  | VUS                             | No                                    | No                                                              | No                                    | In homozygosity region                                                                   | Unlikely disease causing |
| SMYD1                          |                      | ENST00000419482.7                                                                                                                                                                               | Chr2(GRC37):<br>g.8840998G>A            | c.1426G>A              | p.(Glu478Lys)        | Hom                | 0.13% (NFE: 0.22%)                                           | SMP                                  | VUS                             | No                                    | No                                                              | Yes (mouse), no infertility described | In homozygosity region                                                                   | Unlikely disease causing |
| CMC1                           |                      | ENST00000466830.5                                                                                                                                                                               | Chr3(GRC37):<br>g.28361095T>C           | c.296T>C               | p.(Leu99Pro)         | Hom                | 0.01% (AMR: 0.04%)                                           | MP                                   | VUS                             | No                                    | No                                                              | No                                    | In homozygosity region                                                                   | Unlikely disease causing |
| SEMA6A                         |                      | ENST00000343348.10                                                                                                                                                                              | Chr5(GRC37):<br>g.113840627G>T          | c.14C>A                | p.(Ala5Asp)          | Hom                | 0.00% (AMR: 0.02%)                                           | ASMP                                 | VUS                             | No                                    | No                                                              | No                                    | In homozygosity region                                                                   | Unlikely disease causing |
| CRCP                           |                      | ENST00000395326.8                                                                                                                                                                               | Chr7(GRC37):<br>g.65595789C>A           | c.64G>A                | p.(Asp22Asn)         | Hom                | 0.00%                                                        | MP                                   | VUS                             | No                                    | No                                                              | No                                    | In homozygosity region                                                                   | Unlikely disease causing |
| ROB3                           |                      | ENST00000397801.6                                                                                                                                                                               | Chr11(GRC37):<br>g.124740539C>T         | c.968C>T               | p.(Thr323Met)        | Hom                | 0.23% (SAS: 0.68%)                                           | SMP                                  | VUS                             | No                                    | Interacts with known infertility gene SEMA3A                    | Yes (mouse), no infertility described | In homozygosity region                                                                   | Unlikely disease causing |
| GCN1                           |                      | ENST00000306648.7                                                                                                                                                                               | Chr12(GRC37):<br>g.120585064A>C         | c.4739T>G              | p.(Val1580Gly)       | Hom                | 0.00% (NFE: 0.00%)                                           | ASMP                                 | VUS                             | No                                    | No                                                              | No                                    | In homozygosity region                                                                   | Unlikely disease causing |
| CLEC14A                        |                      | ENST00000342213.2                                                                                                                                                                               | Chr14(GRC37):<br>g.38724528G>A          | c.700C>T               | p.(Arg234Cys)        | Hom                | 0.01% (AFR: 0.05)                                            | ASP                                  | VUS                             | No                                    | No                                                              | No                                    | In homozygosity region                                                                   | Unlikely disease causing |
| SLC12A1                        |                      | ENST00000396577.7                                                                                                                                                                               | Chr15(GRC37):<br>g.4850285G>A           | c.347G>A               | p.(Arg164His)        | Hom                | 0.34% (OTH: 0.53%)                                           | SMP                                  | VUS                             | No                                    | Interacts with known infertility gene CFTR                      | No                                    | In homozygosity region                                                                   | Unlikely disease causing |
| C10I1                          |                      | ENST00000488633.1                                                                                                                                                                               | Chr2(GRC37):<br>g.9693426G>A            | c.560G>A               | p.(Cys187Tyr)        | Hom                | 0.00% (AFR: 0.01%)                                           | M                                    | VUS                             | No                                    | Interacts with known infertility gene WT1 and NSAI              | No                                    | -                                                                                        | Unlikely disease causing |
| SNW1                           |                      | ENST00000261531.11                                                                                                                                                                              | Chr14(GRC37):<br>g.78184445_78184447del | c.1675_1677del         | p.(Arg559del)        | Hom                | 0.00%                                                        | N/A                                  | VUS                             | No                                    | Interacts with known infertility genes AR and MAAILD1           | No                                    | -                                                                                        | Unlikely disease causing |

(continued)

Supplementary Table SIII Continued

| Patient     | Gene              | Transcript                         | gDNA variant                     | cDNA           | Protein        | Zigosity           | GnomAD variant frequency (population with highest frequency) | Predicted to be pathogenic* | Variant classification (ACMG)** | Gene expression enriched in testis*** | Interaction with known infertility gene****                                                                       | Disease model described (PMID)                    | Additional information (PMID)                     | Conclusion                                                                                                                                                                                                                                    |                                                                     |                          |
|-------------|-------------------|------------------------------------|----------------------------------|----------------|----------------|--------------------|--------------------------------------------------------------|-----------------------------|---------------------------------|---------------------------------------|-------------------------------------------------------------------------------------------------------------------|---------------------------------------------------|---------------------------------------------------|-----------------------------------------------------------------------------------------------------------------------------------------------------------------------------------------------------------------------------------------------|---------------------------------------------------------------------|--------------------------|
| <b>ARG9</b> | COL18A1           | ENST00000651438.1<br>g.46925116C>T | Chr2(GRCh37):<br>g.46925116C>T   | c.2947C>T      | p.(Arg983Cys)  | Hom                | 0.04% (ASJ: 0.09%)                                           | SP                          | VUS                             | No                                    | Interacts with known infertility gene AR                                                                          | Yes (mouse), no infertility described             | -                                                 | Unlikely disease causing                                                                                                                                                                                                                      |                                                                     |                          |
|             |                   |                                    | Chr3(GRCh37):<br>g.113084927T>C  | c.2674A>G      | p.(Met892Val)  | Het                | 0.05% (AMR: 0.08%)                                           | -                           | Likely benign                   | VUS                                   | Yes                                                                                                               | Interacts with known asthenozoospermia gene DNAH1 | Yes, mouse (28552195)                             | Known gene (28552195)                                                                                                                                                                                                                         | Disease causing                                                     |                          |
|             |                   |                                    | Chr3(GRCh37):<br>g.113098344T>C  | c.2107A>G      | p.(Arg708Gly)  | Het                | 0.00%                                                        | SP                          | -                               | -                                     | VUS                                                                                                               | No                                                | -                                                 | -                                                                                                                                                                                                                                             | -                                                                   | -                        |
|             |                   |                                    | Chr3(GRCh37):<br>g.113098347T>A  | c.2104A>T      | p.(Ile702Leu)  | Het                | 0.00%                                                        | -                           | -                               | Likely benign                         | VUS                                                                                                               | Yes                                               | -                                                 | -                                                                                                                                                                                                                                             | -                                                                   | -                        |
|             |                   |                                    | Chr3(GRCh37):<br>g.113120383A>G  | c.1174T>C      | p.(Trp392Arg)  | Het                | 0.00%                                                        | SMP                         | -                               | -                                     | VUS                                                                                                               | No                                                | -                                                 | -                                                                                                                                                                                                                                             | -                                                                   | -                        |
| UGT2B17     | ENST00000317746.2 | Chr4(GRCh37):<br>g.694035599A>G    | c.1337T>C                        | p.(Leu446Ser)  | Hom            | 0.25% (AMR: 0.71%) | SP                                                           | -                           | VUS                             | No                                    | Interacts with known infertility genes SDC5A2, HSD17B83, HSD3B2, CYP19A1, CYP17A1 and AR                          | No                                                | -                                                 | Unlikely disease causing                                                                                                                                                                                                                      |                                                                     |                          |
|             |                   | ChrX(GRCh37):<br>g.154158080G>A    | c.3985C>T                        | p.(Arg1329Cys) | Hem            | 0.01% (NFE: 0.01%) | SP                                                           | -                           | -                               | VUS                                   | No                                                                                                                | Interacts with known infertility gene TEX11       | No                                                | -                                                                                                                                                                                                                                             | Unlikely disease causing                                            |                          |
| <b>AUS1</b> | TRIP12            | ENST00000283943.9                  | Chr2(GRCh37):<br>g.2330673014C>T | c.2149G>A      | p.(Val717Ile)  | Het                | 0.01% (NFE: 0.02%)                                           | MP                          | VUS                             | No                                    | Interacts with known infertility gene TRIM37                                                                      | Yes (mouse), no infertility described             | -                                                 | Unlikely disease causing                                                                                                                                                                                                                      |                                                                     |                          |
|             |                   |                                    | Chr2(GRCh37):<br>g.230701593C>G  | c.1115G>C      | p.(Arg372Pro)  | Het                | 0.00%                                                        | MP                          | -                               | -                                     | VUS                                                                                                               | No                                                | -                                                 | -                                                                                                                                                                                                                                             | -                                                                   |                          |
|             |                   |                                    | Chr15(GRCh37):<br>g.72057477G>A  | c.2706G>A      | p.(Ser903Asn)  | Het                | 0.48% (NFE: 0.73%)                                           | M                           | -                               | -                                     | VUS                                                                                                               | No                                                | Interacts with known asthenozoospermia gene ARMC2 | No                                                                                                                                                                                                                                            | -                                                                   | Unlikely disease causing |
|             |                   |                                    | Chr15(GRCh37):<br>g.72057477G>A  | c.2939A>G      | p.(Tyr980Cys)  | Het                | 0.00% (NFE: 0.00%)                                           | SMP                         | VUS                             | -                                     | VUS                                                                                                               | No                                                | Interacts with known infertility gene CYP11A1     | Yes (mouse), no infertility described                                                                                                                                                                                                         | -                                                                   | Unlikely disease causing |
|             |                   |                                    | Chr17(GRCh37):<br>g.37815071C>T  | c.644C>T       | p.(Ala215Val)  | Het                | 0.00%                                                        | MP                          | -                               | -                                     | VUS                                                                                                               | No                                                | -                                                 | -                                                                                                                                                                                                                                             | -                                                                   | -                        |
| <b>AUS2</b> | DNAH1             | ENST00000420323.6                  | Chr3(GRCh37):<br>g.52397021G>A   | c.5105G>A      | p.(Arg702Gln)  | Het                | 0.00% (NFE: 0.00%)                                           | SMP                         | VUS                             | No                                    | Interacts with known asthenozoospermia genes GFAP4, DNAH17, DPY19L2, SPATA16, GFAP44, WDR66, CDC40, CDC39, DNAAF2 | Yes, mouse (11371505)                             | Known gene (24360805)                             | Disease causing                                                                                                                                                                                                                               |                                                                     |                          |
|             |                   |                                    | Chr3(GRCh37):<br>g.52428678G>C   | c.10823 + 1G>C | p.?            | Het                | 0.00%                                                        | N/A                         | Likely pathogenic               | VUS                                   | No                                                                                                                | -                                                 | -                                                 | -                                                                                                                                                                                                                                             | -                                                                   |                          |
|             |                   |                                    | Chr3(GRCh37):<br>g.41723090C>T   | c.2887G>A      | p.(Val963Met)  | Het                | 0.34% (NFE: 0.48%)                                           | P                           | -                               | -                                     | VUS                                                                                                               | Yes                                               | Yes (mouse), no infertility described             | Likely on same allele                                                                                                                                                                                                                         | Unlikely disease causing                                            |                          |
|             |                   |                                    | Chr3(GRCh37):<br>g.2056G>A       | p.(Val68Ile)   | Het            | 0.35% (NFE: 0.50%) | SP                                                           | VUS                         | -                               | -                                     | VUS                                                                                                               | No                                                | -                                                 | -                                                                                                                                                                                                                                             | -                                                                   | -                        |
|             |                   |                                    | Chr15(GRCh37):<br>g.89868870G>A  | c.1760C>T      | p.(Pro587Leu)  | Het                | 0.15% (NFE: 0.26%)                                           | MP                          | -                               | -                                     | VUS                                                                                                               | No                                                | Interacts with known infertility gene CTR         | Yes, mouse (15164064)                                                                                                                                                                                                                         | Mouse phenotype does not match MMAF. Variants likely on same allele | Unlikely disease causing |
| <b>AUS3</b> | DNAH6             | ENST0000047676.6                   | ChrX(GRCh37):<br>g.15293692T>C   | c.917A>G       | p.(Gln306Arg)  | Hem                | 0.00%                                                        | ASMP                        | VUS                             | No                                    | Interacts with known infertility gene CYP19A1                                                                     | No                                                | -                                                 | Unlikely disease causing                                                                                                                                                                                                                      |                                                                     |                          |
|             |                   |                                    | Chr2(GRCh37):<br>g.84940276A>G   | c.9436A>G      | p.(Ser3146Gly) | Het                | 0.20% (NFE: 0.40%)                                           | MP                          | -                               | -                                     | VUS                                                                                                               | Yes                                               | Yes, mouse and zebrafish (26918622)               | Variants are likely located on the same allele. Mutations were previously described in patients with azoospermia (28206990), teratozoospermia characterized by globozoospermia and asexual spermatozoa (29356036) and heterozygous (26918622) | Unlikely disease causing                                            |                          |
|             |                   |                                    | Chr2(GRCh37):<br>g.859043186G>A  | c.12352G>A     | p.(Ala4118Thr) | Het                | 0.20% (NFE: 0.40%)                                           | MP                          | -                               | -                                     | VUS                                                                                                               | No                                                | -                                                 | -                                                                                                                                                                                                                                             | -                                                                   | -                        |
|             |                   |                                    | Chr2(GRCh37):<br>g.14111620C>T   | c.11227G>A     | p.(Gly3743Ser) | Het                | 0.67% (ASJ: 1.02)                                            | ASMP                        | -                               | -                                     | VUS                                                                                                               | No                                                | Interacts with known infertility gene DMRT1       | Yes (mouse), no infertility described                                                                                                                                                                                                         | -                                                                   | Unlikely disease causing |
|             |                   |                                    | Chr3(GRCh37):<br>g.89868870G>A   | p.(Ser3244Leu) | Het            | 0.00% (AMR: 0.01%) | ASMP                                                         | VUS                         | -                               | -                                     | VUS                                                                                                               | No                                                | -                                                 | -                                                                                                                                                                                                                                             | -                                                                   | -                        |

(continued)

Supplementary Table SIII Continued

| Patient                                 | Gene  | Transcript         | gDNA variant                                | cDNA                             | Protein                                                                | Zygosity                                 | GnomAD variant frequency (population with pathogenic* highest frequency) | Predicted to be pathogenic*                                                          | Variant classification (ACMG)** | Gene expression enriched in testis*** | Interaction with known infertility gene***                                           | Disease model described (PMID)        | Additional information (PMID)                                                                                                                                                                                 | Conclusion               |
|-----------------------------------------|-------|--------------------|---------------------------------------------|----------------------------------|------------------------------------------------------------------------|------------------------------------------|--------------------------------------------------------------------------|--------------------------------------------------------------------------------------|---------------------------------|---------------------------------------|--------------------------------------------------------------------------------------|---------------------------------------|---------------------------------------------------------------------------------------------------------------------------------------------------------------------------------------------------------------|--------------------------|
| Chr2(GRC37):<br>g.141215115G>A<br>ESPIN | ESPIN |                    | c.1474C>G<br>VUS                            | ESPIN<br>p.(Gln492Glu)<br>No     | Interacts with known MYAF gene GFAP44 and known infertility gene PLCZ1 | Yes (mouse), no infertility described    | ENST00000343063.8                                                        | Chr2(GRC-1)32: g.239038829C>G<br>Het: 0.31% (ASJ: 0.87%)<br>Unlikely disease causing | Het                             | 0.47% (ASJ: 0.60)                     | SP                                                                                   | VUS                                   | -                                                                                                                                                                                                             | Unlikely disease causing |
| Chr2(GRC37):<br>g.23904065G>A           |       | P<br>c.2710G>A     | Chr16(GRC37):<br>g.3139190C>A<br>c.1436C>A  | p.(Ala749Ser)<br>p.(Ser479Tyr)   | Het                                                                    | 0.36% (AMR: 0.53%)                       | VUS                                                                      | -                                                                                    | VUS                             | No                                    | Interacts with known infertility gene SOX2                                           | Yes (mouse), no infertility described | -                                                                                                                                                                                                             | Unlikely disease causing |
| ZSCAN10                                 |       | ENST00000576985.6  | Chr16(GRC37):<br>g.3139190C>A<br>c.1436C>A  | p.(Ala749Ser)<br>p.(Ser479Tyr)   | Het                                                                    | 0.36% (AMR: 0.53%)                       | VUS                                                                      | -                                                                                    | VUS                             | No                                    | Interacts with known infertility gene SOX2                                           | Yes (mouse), no infertility described | -                                                                                                                                                                                                             | Unlikely disease causing |
| Chr16(GRC37):<br>g.3139999G>T           |       |                    | Chr16(GRC37):<br>g.3139999G>T               | p.(Ser479Tyr)                    | Het                                                                    | 0.36% (AMR: 0.53%)                       | VUS                                                                      | -                                                                                    | VUS                             | No                                    | Interacts with known infertility gene SOX2                                           | Yes (mouse), no infertility described | -                                                                                                                                                                                                             | Unlikely disease causing |
| MCFZ                                    |       | ENST00000519895.5  | ChrX(GRC37):<br>g.138701770C>G              | p.(Leu321Phe)                    | Hem                                                                    | 0.00% (SAS: 0.03%)                       | M                                                                        | Unlikely disease causing                                                             | VUS                             | Yes                                   | -                                                                                    | Yes (mouse), no infertility described | -                                                                                                                                                                                                             | Unlikely disease causing |
| SYP                                     |       | ENST00000263233.8  | ChrX(GRC37):<br>g.49050648C>T               | p.(Arg133Gln)                    | Hem                                                                    | 0.00% (AFR: 0.02%)                       | MP                                                                       | Unlikely disease causing                                                             | VUS                             | No                                    | Interacts with known infertility genes AR, SOX2 and WT1                              | Yes (mouse), no infertility described | -                                                                                                                                                                                                             | Unlikely disease causing |
| NONO                                    |       | ENST00000276079.13 | ChrX(GRC37):<br>g.70510568<br>70510570dup   | p.(Gln27dup)                     | Hem                                                                    | 0.00% (AMR: 0.00%)                       | N/A                                                                      | Unlikely disease causing                                                             | VUS                             | No                                    | Interacts with known infertility gene AR                                             | Yes (mouse), no infertility described | -                                                                                                                                                                                                             | Unlikely disease causing |
| SPPL2C                                  |       | ENST00000329196.6  | Chr17(GRC37):<br>g.43922906C>T              | p.(Arg212Tyr)                    | Hom                                                                    | 0.01% (SAS: 0.06)                        | S                                                                        | Unlikely disease causing                                                             | VUS                             | Yes                                   | No                                                                                   | Yes, mouse (30733280)                 | SPPL2c deficiency leads to a partial loss of elongated sperm tails and reduced motility of mature spermatozoa, but preserved fertility in mice (30733280). Possibly involved in acrosome formation (30733281) | Novel candidate gene     |
| HERCZ                                   |       | ENST00000261609.12 | Chr15(GRC37):<br>g.28389216G>A<br>c.7307C>T | p.(Ala375Val)<br>p.(Thr2436Met)  | Het                                                                    | 0.00% (SAS: 0.00%)<br>0.00% (EAS: 0.03%) | SMP<br>VUS                                                               | Unlikely disease causing                                                             | VUS                             | No                                    | Interacts with known asthenozoospermia gene CEP290 and known infertility gene TRIM37 | Yes, mouse (7604002, 10441737)        | -                                                                                                                                                                                                             | Unlikely disease causing |
| Chr15(GRC37):<br>g.28447666G>A          |       |                    | Chr15(GRC37):<br>g.28447666G>A              | p.(Ala375Val)                    | Het                                                                    | 0.00% (SAS: 0.00%)                       | SMP                                                                      | Unlikely disease causing                                                             | VUS                             | No                                    | Interacts with known asthenozoospermia gene CEP290 and known infertility gene TRIM37 | Yes, mouse (7604002, 10441737)        | -                                                                                                                                                                                                             | Unlikely disease causing |
| USH2A                                   |       | ENST00000307340.8  | Chr17(GRC37):<br>g.16138711A>C<br>c.5608C>T | p.(Arg2356Lys)<br>p.(Arg1870Tyr) | Het                                                                    | 0.08% (EAS: 1.03%)<br>0.0% (EAS: 0.39%)  | SMP<br>VUS                                                               | Unlikely disease causing                                                             | VUS                             | Yes                                   | Interacts with known asthenozoospermia gene CEP290                                   | Yes (mouse), no infertility described | Known gene for Retinitis pigmentosa and Usher syndrome                                                                                                                                                        | Unlikely disease causing |
| Chr17(GRC37):<br>g.26246607G>A          |       |                    | Chr17(GRC37):<br>g.26246607G>A              | p.(Arg2356Lys)                   | Het                                                                    | 0.08% (EAS: 1.03%)                       | SMP                                                                      | Unlikely disease causing                                                             | VUS                             | Yes                                   | Interacts with known asthenozoospermia gene CEP290                                   | Yes (mouse), no infertility described | Known gene for Retinitis pigmentosa and Usher syndrome                                                                                                                                                        | Unlikely disease causing |
| SOX2                                    |       | ENST00000392650.8  | Chr17(GRC37):<br>g.71334848G>C<br>c.3207>C  | p.(Arg2133Gly)<br>p.(Val107Ala)  | Het                                                                    | 0.01% (EAS: 0.15%)<br>0.00%              | SMP<br>VUS                                                               | Unlikely disease causing                                                             | VUS                             | Yes                                   | No                                                                                   | Yes (mouse), no infertility described | -                                                                                                                                                                                                             | Unlikely disease causing |
| Chr17(GRC37):<br>g.71468262A>G          |       |                    | Chr17(GRC37):<br>g.71468262A>G              | p.(Arg2133Gly)                   | Het                                                                    | 0.01% (EAS: 0.15%)                       | SMP                                                                      | Unlikely disease causing                                                             | VUS                             | Yes                                   | No                                                                                   | Yes (mouse), no infertility described | -                                                                                                                                                                                                             | Unlikely disease causing |
| CLSPN                                   |       | ENST00000318121.8  | Chr1(GRC37):<br>g.36217035C>T               | p.(Arg699Lys)                    | Hem                                                                    | 0.02% (EAS: 0.26%)                       | SMP                                                                      | Unlikely disease causing                                                             | VUS                             | Yes                                   | No                                                                                   | Yes (mouse), no infertility described | -                                                                                                                                                                                                             | Unlikely disease causing |
| RP54Y2                                  |       | ENST00000629237.1  | ChrY(GRC37):<br>g.22941505G>C               | p.(Gly215Arg)                    | Hem                                                                    | 0.00%                                    | SP                                                                       | Unlikely disease causing                                                             | VUS                             | Yes                                   | No                                                                                   | Yes (mouse), no infertility described | -                                                                                                                                                                                                             | Unlikely disease causing |
| QRGH2                                   |       | ENST00000262765.10 | Chr17(GRC37):<br>g.7430058dup               | p.(Thr49Asnfs*31)                | Hom                                                                    | 0.00% (NFE: 0.00%)<br>0.11% (NFE: 0.20%) | N/A<br>SMP                                                               | Unlikely disease causing                                                             | VUS                             | Yes                                   | No                                                                                   | Yes, mouse (30683861)                 | Known gene (30683861, 31292949)                                                                                                                                                                               | Disease causing          |
| ANKAR                                   |       | ENST00000520309.5  | Chr2(GRC37):<br>g.190608005G>A              | p.(Arg1272His)                   | Hem                                                                    | 0.11% (NFE: 0.20%)                       | SMP                                                                      | Unlikely disease causing                                                             | VUS                             | Yes                                   | No                                                                                   | No                                    | In homozygosity region                                                                                                                                                                                        | Unlikely disease causing |
| BCORL1                                  |       | ENST00000540032.5  | ChrX(GRC37):<br>g.129147652C>T              | p.(Pro302Ser)                    | Hem                                                                    | 0.00% (NFE: 0.01%)                       | S                                                                        | Unlikely disease causing                                                             | VUS                             | No                                    | Interacts with known infertility gene WT1                                            | No                                    | -                                                                                                                                                                                                             | Unlikely disease causing |
| MMP19                                   |       | ENST00000322649.9  | Chr12(GRC37):<br>g.56231659G>A              | p.(Ser443Lleu)                   | Hem                                                                    | 0.01% (ASJ: 0.02%)                       | MP                                                                       | Unlikely disease causing                                                             | VUS                             | No                                    | Interacts with known infertility gene RSPD1                                          | Yes (mouse), no infertility described | -                                                                                                                                                                                                             | Unlikely disease causing |
| TPTE2                                   |       | ENST00000400230.6  | Chr13(GRC37):<br>g.20038622G>A              | p.(Gln239P)                      | Hem                                                                    | 0.00% (NFE: 0.19%)                       | N/A                                                                      | Likely pathogenic                                                                    | VUS                             | Yes                                   | No                                                                                   | No                                    | Voltage-sensitive phosphatases (22896666)                                                                                                                                                                     | Novel candidate gene     |
| OPLAH                                   |       | ENST00000618853.5  | Chr8(GRC37):<br>g.145109562G>A<br>c.157C>T  | p.(Thr863Ile)<br>p.(Arg53Cys)    | Het                                                                    | 0.00% (AFR: 0.03%)<br>0.03% (AMR: 0.04%) | P<br>VUS                                                                 | Unlikely disease causing                                                             | VUS                             | Yes                                   | No                                                                                   | Yes (mouse), no infertility described | Associated with 5-oxoprolinase deficiency (23430506)                                                                                                                                                          | Unlikely disease causing |

(continued)

## Supplementary Table S111 Continued

| Patient | Gene                       | Transcript         | gDNA variant                  | cDNA                | Protein                          | Zygosity           | GnomAD variant frequency (population with highest frequency) | Predicted to be pathogenic <sup>c</sup> | Variant classification (ACMG)** | Gene expression enriched in testis*** | Interaction with known infertility gene***                     | Disease model described (PMID) | Additional information (PMID)                                                                                                                         | Conclusion               |
|---------|----------------------------|--------------------|-------------------------------|---------------------|----------------------------------|--------------------|--------------------------------------------------------------|-----------------------------------------|---------------------------------|---------------------------------------|----------------------------------------------------------------|--------------------------------|-------------------------------------------------------------------------------------------------------------------------------------------------------|--------------------------|
|         | Ch6(GRCh37): g:145114779>A |                    |                               |                     |                                  |                    |                                                              |                                         |                                 |                                       |                                                                |                                |                                                                                                                                                       |                          |
|         | AFZ                        |                    |                               | AFZ<br>p.(Arg70Gln) | Hem<br>Unlikely disease causing  | 0.00% (AFR: 0.02%) | ENST00000370460.6<br>SMP                                     | ChX(GRC-<br>M3) 17743457G>A             | No                              | Yes                                   | Interacts with known asthenozoospermia genes DNAH1 and SFEZ    | Yes, mouse (28552195)          | Known gene (28552195). In homozygosity region                                                                                                         | Disease causing          |
| AUS8    | CFAP4                      | ENST00000357060.7  | Chr10(GRCh37): g:105985300T>A | c.335A>T            | p.(Asp112Val)                    | Hem                | 0.01% (NFE: 0.01%)                                           | SMP                                     | VUS                             | Yes                                   | Interacts with known asthenozoospermia genes DNAH1 and SFEZ    | Yes, mouse (28552195)          | Known gene (28552195). In homozygosity region                                                                                                         | Disease causing          |
| AUS9    | CFAP4                      | ENST00000357060.7  | Chr10(GRCh37): g:105985300T>A | c.944del            | p.(Gly315AlaE*72)                | Hem                | 0.00%                                                        | N/A                                     | Pathogenic                      | Yes                                   | Interacts with known asthenozoospermia genes DNAH1 and SFEZ    | Yes, mouse (28552195)          | Known gene (28552195). In homozygosity region                                                                                                         | Disease causing          |
| AUS10   | SPTA1                      | ENST00000643759.1  | Chr1(GRCh37): g:158613133C>T  | c.442IG>A           | p.(Arg1474Gln)                   | Het                | 0.00% (EAS: 0.05%)                                           | SMP                                     | VUS                             | No                                    | Interacts with known infertility gene TEX15                    | Yes, mouse (20056793)          | Known gene for elliptocytosis, pyropoikilocytosis and spherocytosis. Unlikely affecting sperm cell morphology                                         | Unlikely disease causing |
| AUS11   | MDC1                       | ENST00000376406.8  | Chr6(GRCh37): g:158644127G>A  | c.1342C>T           | p.(Arg418Trp)                    | Het                | 0.02% (AMR: 0.15%)                                           | SP                                      | VUS                             | No                                    | Interacts with known infertility gene AR                       | Yes, mouse (16427009)          | Possibly meiotic defect                                                                                                                               | Novel candidate gene     |
| AUS12   | QRGH2                      | ENST00000262765.10 | Chr17(GRCh37): g:74300534C>T  | c.2134C>T           | p.(Gln712)                       | Het                | 0.00%                                                        | N/A                                     | Likely pathogenic               | Yes                                   | Interacts with known infertility gene AR                       | Yes, mouse (16427009)          |                                                                                                                                                       | Novel candidate gene     |
|         |                            |                    |                               | c.472C>T            | p.(Gln158)                       | Het                | 0.00%                                                        | N/A                                     | Likely pathogenic               | No                                    | Interacts with known infertility gene CHD7, SOX2, CATA4 and AR | No                             |                                                                                                                                                       | Unlikely disease causing |
|         |                            |                    |                               | c.1876A>G           | p.(Ser626Gly)                    | Hem                | 0.00%                                                        | SMP                                     | VUS                             | No                                    | Interacts with known infertility gene CHD7, SOX2, CATA4 and AR | Yes, mouse (30683861)          | Known gene (30683861, 31292549). In homozygosity region                                                                                               | Likely disease causing   |
|         |                            |                    |                               | c.169G>A            | p.(Glu57Lys)                     | Hem                | 0.01% (NFE: 0.02)                                            | P                                       | VUS                             | Yes                                   | Interacts with known infertility gene AR                       | Yes, mouse (30683861)          | Known gene (30683861, 31292549). In homozygosity region                                                                                               | Likely disease causing   |
|         |                            |                    |                               | c.1369C>T           | p.(Pro457Ser)                    | Hem                | 0.23% (FIN: 0.58%)                                           | M                                       | VUS                             | No                                    | Interacts with known infertility gene AR                       | No                             | Known gene for Uncombable hair syndrome. In homozygosity region                                                                                       | Unlikely disease causing |
|         |                            |                    |                               | c.284G>C            | p.(Cys95Ser)                     | Hem                | 0.05% (OTH: 0.08%)                                           | ASMP                                    | VUS                             | No                                    | Interacts with known infertility gene AR                       | No                             | Known gene for Uncombable hair syndrome. In homozygosity region                                                                                       | Unlikely disease causing |
|         |                            |                    |                               | c.796_797delinsAG   | p.(Asp266Ser)                    | Hem                | 0.10% (ASJ: 0.91%)                                           | SP                                      | VUS                             | No                                    | Interacts with known infertility gene AR                       | No                             | Known gene for Uncombable hair syndrome. In homozygosity region                                                                                       | Unlikely disease causing |
|         |                            |                    |                               | c.2071T>G           | p.(Cys691Gly)                    | Hem                | 0.20% (FIN: 0.81%)                                           | SMP                                     | VUS                             | Yes                                   | Interacts with known infertility gene AR                       | No                             | Known gene for Uncombable hair syndrome. In homozygosity region                                                                                       | Unlikely disease causing |
|         |                            |                    |                               | c.2113T>G           | p.(Leu705Val)                    | Hem                | 0.00%                                                        | SMP                                     | VUS                             | No                                    | Interacts with known infertility gene AR                       | No                             | Known gene for Uncombable hair syndrome. In homozygosity region                                                                                       | Unlikely disease causing |
|         |                            |                    |                               | c.1094C>G           | p.(Ser365Cys)                    | Hem                | 0.00% (NFE: 0.22%)                                           | S                                       | VUS                             | No                                    | Interacts with known infertility gene AR                       | No                             | Known gene for Epidermolysis bullosa simplex, autosomal recessive 2 and Neurotathy, hereditary sensory and autonomic, type VI. In homozygosity region | Unlikely disease causing |
|         |                            |                    |                               | c.889_892del        | p.(Lys297delins<br>GluGlyAlaGln) | Hem                | 0.22% (AMR: 0.67%)                                           | N/A                                     | VUS                             | No                                    | Interacts with known infertility gene APOA1                    | No                             | Known gene for Orthostatic hypotension 1, due to DBH deficiency. In homozygosity region                                                               | Unlikely disease causing |
|         |                            |                    |                               | c.1085C>T           | p.(Ala362Val)                    | Hem                | 0.22% (FIN: 0.56%)                                           | ASMP                                    | VUS                             | No                                    | Interacts with known infertility gene APOA1                    | No                             | Known gene for Orthostatic hypotension 1, due to DBH deficiency. In homozygosity region                                                               | Unlikely disease causing |
|         |                            |                    |                               | c.275_277del        | p.(Pro92del)                     | Hem                | 0.01% (NFE: 0.02%)                                           | N/A                                     | VUS                             | No                                    | Interacts with known infertility gene APOA1                    | No                             | Known gene for Orthostatic hypotension 1, due to DBH deficiency. In homozygosity region                                                               | Unlikely disease causing |

\*A: Align GVGD, S: SIFT, M: MutationTaster, P: PolyPhen-2.

\*\*VUS, Variant of Unknown Significance.

\*\*\*Based on the Human Protein Atlas version 19.1.

\*\*\*\*Based on STRING version 11.0.
