# Supplementary material for: Exome sequencing reveals variants in known and novel candidate genes for severe sperm motility disorders
Source: PubMed Central journal article supplement (PMC8373475; doi:10.1093/humrep/deab099), 2021-06-05
Supplement: deab099_supplementary_tables4.pdf [file deab099_supplementary_tables4.pdf]

Supplementary Table SIV Homozygosity regions detected in all patients.

| Sample | Chromosome | Start_positions | End_positions | Length     | Variants in region | perc_HMZ |
|--------|------------|-----------------|---------------|------------|--------------------|----------|
| ARG1   | 2          | 160,742,862     | 167,163,043   | 6,420,181  | 151                | 88       |
| ARG1   | 2          | 182,346,954     | 187,455,278   | 5,108,324  | 59                 | 87       |
| ARG4   | 6          | 44,253,749      | 56,846,774    | 12,593,025 | 253                | 89       |
| ARG4   | 10         | 85,960,296      | 94,700,460    | 8,740,164  | 152                | 91       |
| ARG4   | 21         | 33,730,128      | 43,824,123    | 10,093,995 | 332                | 93       |
| ARG6   | 2          | 218,683,139     | 223,918,080   | 5,234,941  | 194                | 92       |
| ARG6   | 6          | 44,268,371      | 51,619,808    | 7,351,437  | 85                 | 88       |
| ARG8   | 1          | 177,929,554     | 221,055,463   | 43,125,909 | 380                | 92       |
| ARG8   | 2          | 99,804,642      | 118,575,215   | 18,770,573 | 123                | 87       |
| ARG8   | 3          | 14,106,310      | 49,726,028    | 35,619,718 | 257                | 95       |
| ARG8   | 3          | 49,829,326      | 75,786,440    | 25,957,114 | 187                | 92       |
| ARG8   | 3          | 119,118,104     | 183,212,026   | 64,093,922 | 355                | 92       |
| ARG8   | 5          | 89,990,324      | 134,344,497   | 44,354,173 | 199                | 89       |
| ARG8   | 6          | 150,004,779     | 166,571,935   | 16,567,156 | 149                | 91       |
| ARG8   | 7          | 42,970,733      | 56,087,319    | 13,116,586 | 96                 | 90       |
| ARG8   | 11         | 121,403,229     | 129,794,950   | 8,391,721  | 133                | 89       |
| ARG8   | 12         | 118,682,751     | 131,296,880   | 12,614,129 | 138                | 88       |
| ARG8   | 13         | 95,097,956      | 115,047,464   | 19,949,508 | 158                | 92       |
| ARG8   | 14         | 21,623,648      | 50,120,858    | 28,497,210 | 245                | 91       |
| ARG8   | 15         | 31,320,703      | 70,345,626    | 39,024,923 | 422                | 90       |
| ARG8   | 22         | 36,124,860      | 45,204,519    | 9,079,659  | 161                | 89       |
| ARG8   | 22         | 45,931,262      | 51,137,249    | 5,205,987  | 107                | 98       |
| AUS4   | 11         | 49,054,028      | 56,143,544    | 7,089,516  | 106                | 87       |
| AUS5   | 2          | 172,339,964     | 207,621,759   | 35,281,795 | 845                | 97       |
| AUS5   | 10         | 62,540,165      | 72,432,521    | 9,892,356  | 201                | 93       |
| AUS5   | 13         | 52,536,114      | 60,707,316    | 8,171,202  | 68                 | 86       |
| AUS5   | 16         | 46,696,284      | 53,913,911    | 7,217,627  | 93                 | 88       |
| AUS7   | 9          | 13,112,116      | 18,680,350    | 5,568,234  | 135                | 85       |
| AUS8   | 2          | 151,858,101     | 159,651,973   | 7,793,872  | 179                | 88       |
| AUS8   | 10         | 91,373,847      | 118,397,971   | 27,024,124 | 904                | 95       |
| AUS12  | 1          | 7,805,208       | 12,853,805    | 5,048,597  | 250                | 93       |
| AUS12  | 1          | 17,313,454      | 22,832,743    | 5,519,289  | 412                | 96       |
| AUS12  | 1          | 113,933,570     | 120,612,040   | 6,678,470  | 186                | 93       |
| AUS12  | 1          | 152,192,687     | 161,495,885   | 9,303,198  | 677                | 96       |
| AUS12  | 3          | 140,185,367     | 154,859,581   | 14,674,214 | 217                | 92       |
| AUS12  | 3          | 179,439,567     | 186,390,332   | 6,950,765  | 262                | 92       |
| AUS12  | 6          | 41,657,328      | 57,246,785    | 15,589,457 | 542                | 95       |
| AUS12  | 6          | 62,887,031      | 80,631,539    | 17,744,508 | 248                | 93       |
| AUS12  | 9          | 119,977,077     | 137,004,907   | 17,027,830 | 1,031              | 95       |
| AUS12  | 10         | 63,520,698      | 73,846,826    | 10,326,128 | 371                | 91       |
| AUS12  | 13         | 36,805,625      | 51,969,383    | 15,163,758 | 385                | 91       |
| AUS12  | 14         | 96,771,959      | 105,170,003   | 8,398,044  | 376                | 93       |
| AUS12  | 17         | 67,309,039      | 75,199,580    | 7,890,541  | 480                | 92       |
| AUS12  | 18         | 21,703,649      | 50,683,691    | 28,980,042 | 416                | 93       |
