# Supplementary material for: Exome sequencing reveals variants in known and novel candidate genes for severe sperm motility disorders
Source: PubMed Central journal article supplement (PMC8373475; doi:10.1093/humrep/deab099), 2021-06-05
Supplement: deab099_supplementary_tables5.pdf [file deab099_supplementary_tables5.pdf]

**Supplementary Table SV** Frequency of heterozygous and homozygous missense and loss of function variants in 22 known sperm tail assembly and 6 candidate genes in a cohort of 5784 proven fathers.

| Gene name | Loss of function |            | Rare missense |            |
|-----------|------------------|------------|---------------|------------|
|           | Heterozygous     | Homozygous | Heterozygous  | Homozygous |
| AK7       | 3                | 0          | 126           | 0          |
| AKAP3     | 2482             | 206*       | 126           | 0          |
| AKAP4     | 0                | 0          | 0             | 0          |
| ARMC2     | 4                | 0          | 122           | 0          |
| CFAP100   | 77               | 0          | 272           | 1          |
| CFAP126   | 2                | 0          | 38            | 0          |
| CFAP157   | 9                | 0          | 77            | 0          |
| CFAP161   | 0                | 0          | 25            | 0          |
| CFAP20    | 0                | 0          | 5             | 0          |
| CFAP206   | 12               | 0          | 249           | 0          |
| CFAP221   | 10               | 0          | 125           | 0          |
| CFAP36    | 5                | 0          | 46            | 0          |
| CFAP43    | 12               | 0          | 489           | 0          |
| CFAP44    | 12               | 0          | 384           | 3          |
| CFAP45    | 3                | 0          | 174           | 0          |
| CFAP46    | 126              | 1*         | 1031          | 6          |
| CFAP47    | 0                | 0          | 0             | 0          |
| CFAP52    | 4                | 0          | 82            | 0          |
| CFAP53    | 6                | 0          | 93            | 2          |
| CFAP54    | 35               | 0          | 468           | 3          |
| CFAP57    | 8                | 0          | 295           | 0          |
| CFAP58    | 6                | 0          | 122           | 2          |
| CFAP61    | 51               | 0          | 234           | 1          |
| CFAP65    | 18               | 0          | 426           | 4          |
| CFAP69    | 7                | 1*         | 146           | 1          |
| CFAP70    | 2                | 0          | 111           | 0          |
| CFAP73    | 16               | 0          | 63            | 0          |
| CFAP74    | 52               | 0          | 550           | 1          |
| CFAP77    | 0                | 0          | 165           | 0          |
| CFAP99    | 75               | 0          | 230           | 4          |
| DNAH1     | 25               | 0          | 1241          | 4          |
| DNAH10    | 27               | 1*         | 911           | 5          |
| DNAH10OS  | 2                | 0          | 31            | 0          |
| DNAH11    | 2879             | 1426*      | 1123          | 5          |
| DNAH12    | 49               | 0          | 498           | 4          |
| DNAH14    | 907              | 28*        | 993           | 11         |
| DNAH17    | 26               | 0          | 1136          | 6          |
| DNAH2     | 72               | 0          | 960           | 5          |
| DNAH3     | 46               | 0          | 975           | 13         |
| DNAH5     | 42               | 0          | 808           | 3          |
| DNAH6     | 50               | 0          | 668           | 1          |
| DNAH7     | 177              | 1*         | 973           | 12         |

(continued)

## Supplementary Table SV Continued

| Gene name     | Loss of function |            | Rare missense |            |
|---------------|------------------|------------|---------------|------------|
|               | Heterozygous     | Homozygous | Heterozygous  | Homozygous |
| <i>DNAH8</i>  | 121              | 1*         | 848           | 1          |
| <i>DNAH9</i>  | 274              | 14*        | 752           | 4          |
| <i>DRC1</i>   | 16               | 0          | 208           | 0          |
| <i>DZIP1</i>  | 1                | 0          | 147           | 1          |
| <i>FSIP2</i>  | 33               | 0          | 1349          | 9          |
| <i>MAATS1</i> | 21               | 0          | 120           | 0          |
| <i>MDC1</i>   | 29               | 0          | 412           | 5          |
| <i>PACRG</i>  | 15               | 0          | 74            | 0          |
| <i>QRICH2</i> | 17               | 0          | 343           | 0          |
| <i>SPEF2</i>  | 42               | 0          | 623           | 8          |
| <i>SPPL2C</i> | 0                | 0          | 283           | 0          |
| <i>TPTE2</i>  | 31               | 0          | 68            | 0          |
| <i>TTC21A</i> | 19               | 0          | 181           | 0          |
| <i>WDR66</i>  | 31               | 0          | 315           | 2          |

\*Loss of function variants identified in (potentially) flagellar genes:

– AKAP3:

- Variant: Chr12(GRCh37):g.4735966dup; NM\_001278309.1(AKAP3):c.2102dup; p.(Asp702Argfs4)
- Classification: benign
- Wrongfully called as a LoF variant and is present in 12% of the gnomAD population.

– CFAP46:

- Variant: Chr10(GRCh37):g.134623929G>A; NM\_001200049.2(CFAP46):c.7648C>T; p.(Arg2550\*)
- Classification: uncertain significance
- Nonsense variants in the penultimate exon. It is predicted not to result in nonsense-mediated decay and is therefore a doubtful loss-of-function variant

– CFAP69:

- Variant: Chr7(GRCh37):g.89906394del; NM\_001039706.2(CFAP69):c.992del; p.(Gly331Alafs6)
- Classification: pathogenic
- It is unknown whether this proven father underwent ICSI, but it does show that homozygous LoF variants in CFAP69 likely do not cause sterility

– DNAH10:

- Variant: Chr12(GRCh37):g.124383395\_124383449dup; NM\_207437.3(DNAH10):c.9286 + 34\_9286 + 88dup; p.?
- Classification: pathogenic
- It is unknown whether this proven father underwent ICSI, but it does show that homozygous LoF variants in DNAH10 likely do not cause sterility

– DNAH11:

- Variant: Chr7(GRCh37):g.21582963G>T; NM\_001277115.1(DNAH11):c.100G>T; p.(Glu34)
- Classification: benign
- Variant is located in first exon of DNAH11, the presence of an alternative start site is possible. Variant present in 44% of gnomAD.

– DNAH14:

- Various variants including: Chr1(GRCh37):g.225273315del; NM\_001367479.1(DNAH14):c.3397del; p.(Met1133Cysfs16) and Chr1(GRCh37):g.225380567\_225380570del; NM\_001367479.1(DNAH14):c.5840\_5843del; p.(Lys1947Thrfs\*6)
- Classification of variants: likely benign/benign
- Various homozygous LoF variants present in proven fathers. This gene is very unlikely to be involved in male infertility

– DNAH7:

- Variant: Chr2(GRCh37):g.196851911del; NM\_018897.2(DNAH7):c.1633del; p.(Arg545Valfs2)
- Classification: likely pathogenic
- It is unknown whether this proven father underwent ICSI, but it does show that homozygous LoF variants in DNAH7 likely do not cause sterility

– DNAH8:

- Variant: Chr6(GRCh37):g.38738337T>C; NM\_001206927.1(DNAH8):c.1764 + 2T>C; p.?
- Classification: benign
- This is a canonical splice donor site mutation. The variant is predicted to disrupt splicing, but it is unclear if this is indeed the consequence. Variant is present in 7.2% of the African population in gnomAD

– DNAH9:

- Variant: Chr17(GRCh37):g.11501859\_11501883dup; NM\_001372.3(DNAH9):c.44\_68dup; p.(Arg24Glyfs36)
- Classification: likely benign
- Variant is located in first exon of DNAH9, the presence of an alternative start site is possible. Variant present in 1.3% of gnomAD.
